# Supplementary material for: Ciprofibrate-Loaded Nanoparticles Prepared by Nanoprecipitation: Synthesis, Characterization, and Drug Release
Source: MDPI journal article supplement (doi:10.3390/polym13183158), 2021-09-18
Supplement: s1 [file s1]

# Ciprofibrate-loaded nanoparticles prepared by nanoprecipitation: synthesis, characterization, and drug release

## Supplementary Information

**Table S1:** Final atomic coordinates of all atoms for ciprofibrate crystal structure.

| Atom | x            | y           | z            |
|------|--------------|-------------|--------------|
| C1   | 0.33144(19)  | 0.11517(16) | 0.0522(2)    |
| O2   | 0.4471(2)    | 0.1300(2)   | 0.1227(2)    |
| C3   | 0.3050(2)    | -0.0094(2)  | 0.0142(2)    |
| C4   | 0.2415(2)    | 0.2100(2)   | 0.0161(2)    |
| C5   | 0.48905(16)  | 0.24937(17) | 0.17598(14)  |
| C6   | 0.1917(2)    | -0.0376(2)  | -0.0564(2)   |
| C8   | 0.1306(2)    | 0.1814(2)   | -0.0537(2)   |
| C10  | 0.6210(3)    | 0.2320(5)   | 0.2496(3)    |
| C11  | 0.3940(3)    | 0.2819(5)   | 0.2461(3)    |
| C12  | 0.4803(2)    | 0.36056(17) | 0.09599(13)  |
| C13  | 0.10235(18)  | 0.05846(17) | -0.09102(18) |
| O22  | 0.5324(3)    | 0.3313(4)   | 0.0125(2)    |
| O23  | 0.4546(6)    | 0.4741(3)   | 0.1110(3)    |
| C24  | -0.0226(2)   | 0.02759(19) | -0.16700(15) |
| C26  | -0.0598(3)   | -0.1084(2)  | -0.2078(2)   |
| C27  | -0.03458(16) | -0.0052(2)  | -0.28304(12) |
| Cl31 | 0.1032(2)    | -0.0179(4)  | -0.3354(2)   |
| Cl32 | -0.1641(2)   | 0.0584(3)   | -0.3786(2)   |
| H7   | 0.3652(2)    | -0.0777(2)  | 0.0393(2)    |
| H9   | 0.2569(2)    | 0.2980(2)   | 0.0410(2)    |
| H14  | 0.1748(2)    | -0.1259(2)  | -0.0800(2)   |
| H15  | 0.0694(2)    | 0.2497(2)   | -0.0757(2)   |
| H16  | 0.6809(3)    | 0.2101(5)   | 0.2069(3)    |
| H17  | 0.6455(3)    | 0.3128(5)   | 0.2861(3)    |
| H18  | 0.6179(3)    | 0.1688(5)   | 0.3042(3)    |
| H19  | 0.3925(3)    | 0.2157(5)   | 0.2988(3)    |
| H20  | 0.4175(3)    | 0.3614(5)   | 0.2849(3)    |

|     |            |            |            |
|-----|------------|------------|------------|
| H21 | 0.3085(3)  | 0.2941(5)  | 0.2050(3)  |
| H25 | 0.5379(3)  | 0.4115(4)  | -0.0296(2) |
| H28 | -0.0932(2) | 0.0752(2)  | -0.1516(2) |
| H29 | -0.1435(3) | -0.1419(2) | -0.2093(2) |
| H30 | -0.0015(3) | -0.1791(2) | -0.1858(2) |

**Table S2:** Bond lengths

| Atom 1 | Atom 2 | Bond Length (Å) |
|--------|--------|-----------------|
| O2     | C1     | 1.372(3)        |
| C3     | C1     | 1.375(3)        |
| C4     | C1     | 1.378(3)        |
| O2     | C5     | 1.426(3)        |
| C6     | C3     | 1.376(3)        |
| C8     | C4     | 1.353(3)        |
| C10    | C5     | 1.528(3)        |
| C11    | C5     | 1.541(4)        |
| C5     | C12    | 1.522(2)        |
| C6     | C13    | 1.379(3)        |
| C8     | C13    | 1.360(3)        |
| O22    | C12    | 1.347(4)        |
| O23    | C12    | 1.223(4)        |
| C13    | C24    | 1.506(3)        |
| C26    | C24    | 1.513(3)        |
| C27    | C24    | 1.500(2)        |
| C26    | C27    | 1.497(3)        |
| C27    | Cl31   | 1.763(3)        |
| C27    | Cl32   | 1.761(3)        |

**Table S3:** All angles

| Atom 1 | Atom 2 | Atom 3 | Bond Angle (°) |
|--------|--------|--------|----------------|
| O2     | C1     | C3     | 114.9(2)       |
| O2     | C1     | C4     | 127.4(2)       |
| C4     | C1     | C3     | 117.7(2)       |

|      |     |      |          |
|------|-----|------|----------|
| C5   | O2  | C1   | 123.6(2) |
| C6   | C3  | C1   | 120.7(2) |
| C8   | C4  | C1   | 121.1(2) |
| O2   | C5  | C10  | 110.2(2) |
| O2   | C5  | C11  | 106.5(2) |
| O2   | C5  | C12  | 111.0(2) |
| C11  | C5  | C10  | 108.2(2) |
| C10  | C5  | C12  | 114.3(2) |
| C11  | C5  | C12  | 106.3(2) |
| C3   | C6  | C13  | 120.8(2) |
| C4   | C8  | C13  | 121.9(2) |
| O22  | C12 | C5   | 113.1(2) |
| O23  | C12 | C5   | 126.3(3) |
| O22  | C12 | O23  | 119.1(3) |
| C8   | C13 | C6   | 117.8(2) |
| C6   | C13 | C24  | 120.9(2) |
| C8   | C13 | C24  | 121.3(2) |
| C26  | C24 | C13  | 123.1(2) |
| C27  | C24 | C13  | 123.6(2) |
| C26  | C24 | C27  | 59.6(1)  |
| C27  | C26 | C24  | 59.8(1)  |
| C26  | C27 | C24  | 60.7(1)  |
| C24  | C27 | Cl31 | 120.0(2) |
| C24  | C27 | Cl32 | 118.9(2) |
| C26  | C27 | Cl31 | 118.8(2) |
| C26  | C27 | Cl32 | 118.7(2) |
| Cl32 | C27 | Cl31 | 111.4(2) |

**Table S4:** Torsion angle data

| Atom 1 | Atom 2 | Atom 3 | Atom 4 | Torsion Angle (°) |
|--------|--------|--------|--------|-------------------|
| C5     | O2     | C1     | C3     | -176.1(2)         |
| C5     | O2     | C1     | C4     | 4.2(4)            |

|     |     |     |     |           |
|-----|-----|-----|-----|-----------|
| C1  | O2  | C5  | C10 | 179.3(2)  |
| C1  | O2  | C5  | C11 | 62.2(3)   |
| C1  | O2  | C5  | C12 | -53.1(3)  |
| O2  | C5  | C12 | O22 | -48.6(3)  |
| O2  | C5  | C12 | O23 | 146.0(4)  |
| O22 | C12 | C5  | C10 | 76.8(3)   |
| O23 | C12 | C5  | C10 | -88.7(5)  |
| O22 | C12 | C5  | C11 | -164.0(2) |
| O23 | C12 | C5  | C11 | 30.6(5)   |
| C26 | C24 | C13 | C6  | 1.5(3)    |
| C27 | C24 | C13 | C6  | -71.4(3)  |
| C26 | C24 | C13 | C8  | -178.0(2) |
| C27 | C24 | C13 | C8  | 109.0(2)  |

**Table S5:** Spherical shell data fits

| Sample                                                          | $R_1$ (nm) | $PD$ of $R_1$<br>(nm) | $R_2$<br>(nm) | $\mu$ | $\eta$               | BG     |
|-----------------------------------------------------------------|------------|-----------------------|---------------|-------|----------------------|--------|
| PEO <sub>113</sub> - <i>b</i> -PCL <sub>118</sub>               | 12.2       | 6.6                   | 12.0          | 1     | $7.8 \times 10^{-8}$ | 0.004  |
| PEO <sub>113</sub> - <i>b</i> -PCL <sub>118</sub><br>10 wt% CIP | 12.5       | 6.6                   | 12.0          | 0.97  | $9.3 \times 10^{-8}$ | 0.004  |
| PEO <sub>113</sub> - <i>b</i> -PCL <sub>118</sub><br>20 wt% CIP | 12.6       | 6.6                   | 12.0          | 0.91  | $1.1 \times 10^{-8}$ | 0.004  |
| Pluronic                                                        | 2.3        | 1                     | 1             | 1     | $6.7 \times 10^{-7}$ | 0.0001 |
| Pluronic + 10<br>wt% CIP                                        | 5.7        | 1.9                   | 5.5           | 0.83  | $6.7 \times 10^{-7}$ | 0.0003 |

$R_1$  is the outer radius of the sphere

PD is polydispersity of the outer radius

$R_2$  is the inner radius of the sphere

$\eta$  is scattering contrast of the shell

$\mu$  is the scattering contrast of the core and BG is the background

**Table S6:** Long Cylinder fit for Pluronic + 20CIP

| Sample               | R (nm) | PD of R (nm) | $\eta$               | BG     |
|----------------------|--------|--------------|----------------------|--------|
| Pluronic + 20 w% CIP | 6.5    | 1.1          | $1.0 \times 10^{-5}$ | 0.0001 |

*R* is the radius of the cylinder  
 PD is polydispersity of the cylinder  
 $\eta$  is scattering contrast of the cylinder  
 BG is the background

**Table S7:** Radius of gyration and  $D_{\max}$  (maximum particle dimensions) calculated using the ATSAS software.

| Sample                                                         | $R_g$ (nm) | $D_{\max}$ (nm) |
|----------------------------------------------------------------|------------|-----------------|
| PEO <sub>113</sub> - <i>b</i> -PCL <sub>118</sub>              | 22.2(8.0)  | 80              |
| PEO <sub>113</sub> - <i>b</i> -PCL <sub>118</sub><br>10 w% CIP | 22.2(8.2)  | 80              |
| PEO <sub>113</sub> - <i>b</i> -PCL <sub>118</sub><br>20 w% CIP | 22.9(8.1)  | 80              |
| Pluronic                                                       | 3.7(0.3)   | 14              |
| Pluronic + 10 w% CIP                                           | 6.9(0.4)   | 20              |
| Pluronic + 20 w% CIP                                           | 24.8       | 100             |
